1 **Breinholt et al. – Target enrichment for flagellate plants**

2 **A target enrichment probe set for resolving the flagellate plant tree of life**

3 Jesse W. Breinholt<sup>1,2</sup>; Sarah B. Carey<sup>3</sup>; George P. Tiley<sup>3,4</sup>; E. Christine Davis<sup>3</sup>; Lorena Endara<sup>3</sup>;  
4 Stuart F. McDaniel<sup>3</sup>; Leandro G. Neves<sup>1</sup>; Emily B. Sessa<sup>3</sup>; Matt von Konrat<sup>5</sup>; Sahut  
5 Chantanaorrapint<sup>6</sup>; Susan Fawcett<sup>7</sup>; Stefanie M. Ickert-Bond<sup>8</sup>; Paulo H. Labiak<sup>9</sup>; Juan Larraín<sup>10</sup>;  
6 Marcus Lehnert<sup>11</sup>; Lily R. Lewis<sup>3</sup>; Nathalie S. Nagalingum<sup>12</sup>; Nikisha Patel<sup>13</sup>; Stefan A.  
7 Rensing<sup>14</sup>; Weston Testo<sup>3</sup>; Alejandra Vasco<sup>15</sup>; Juan Carlos Villarreal<sup>16</sup>; Evelyn Webb  
8 Williams<sup>17</sup>; J. Gordon Burleigh<sup>3,18</sup>

10 <sup>1</sup>RAPiD Genomics, Gainesville, FL, USA

11 <sup>2</sup>Intermountain Healthcare, Intermountain Precision Genomics, Saint George, UT, USA;

12 <sup>3</sup>Department of Biology, University of Florida, Gainesville, FL, USA

13 <sup>4</sup>Department of Biology, Duke University, Durham, NC, USA

14 <sup>5</sup>Department of Research and Education, The Field Museum, Chicago, IL, USA

15 <sup>6</sup>Department of Biology, Faculty of Science, Prince of Songkla University, Songkhla, Thailand.

16 <sup>7</sup>Pringle Herbarium, Department of Plant Biology, University of Vermont,

17 Burlington, VT, USA

18 <sup>8</sup>Department of Wildlife and Biology & UA Museum of the North, University of Alaska

19 Fairbanks (UAF), Fairbanks, AK, USA.

20 <sup>9</sup>Dept. Botanica, Universidade Federal do Parana, Curitiba-PR, Brazil

21 <sup>10</sup>Instituto de Biología, Pontificia Universidad Católica de Valparaíso, Valparaíso, Chile

22 <sup>11</sup>Geobotany & Botanical Garden, Herbarium, Martin Luther University Halle-Wittenberg, Halle,

23 Germany

24 <sup>12</sup>California Academy of Sciences, San Francisco, USA

25 <sup>13</sup>Department of Ecology and Evolutionary Biology, University of Connecticut, Storrs, CT, USA

26 <sup>14</sup>Faculty of Biology, University of Marburg, Marburg, Germany

27 <sup>15</sup>Botanical Research Institute of Texas, Fort Worth, TX, USA

28 <sup>16</sup>Department of Biology, Laval University, Quebec City, Quebec, Canada

29 <sup>17</sup>Chicago Botanic Garden, Glencoe, IL, USA

30 <sup>18</sup>Author for correspondence: gburleigh@ufl.edu

31

32

33 Manuscript received \_\_\_\_\_; revision accepted \_\_\_\_\_.

34

35 Number of words: 3490

36

## ABSTRACT

37▪ *Premise of the study:* New sequencing technologies enable the possibility of generating large-  
38 scale molecular datasets for constructing the plant tree of life. We describe a new probe set for  
39 target enrichment sequencing to generate nuclear sequence data to build phylogenetic trees with  
40 any flagellate plants, comprising hornworts, liverworts, mosses, lycophytes, ferns, and  
41 gymnosperms.

42▪ *Methods and Results:* We leveraged existing transcriptome and genome sequence data to design  
43 a set of 56,989 probes for target enrichment sequencing of 451 nuclear exons and non-coding  
44 flanking regions across flagellate plant lineages. We describe the performance of target  
45 enrichment using the probe set across flagellate plants and demonstrate the potential of the data  
46 to resolve relationships among both ancient and closely related taxa.

47▪ *Conclusions:* A target enrichment approach using the new probe set provides a relatively low-  
48 cost solution to obtain large-scale nuclear sequence data for inferring phylogenetic relationships  
49 across flagellate plants.

50

51 **Key words:** flagellate plants; nuclear loci; phylogenomics; target enrichment; next-generation  
52 sequencing

53

54

55

## INTRODUCTION

56 For the first ~300 million years following plants' movement and adaptation to land,  
57 Earth's terrestrial flora consisted of flagellate plants, or plants with mobile flagellate male  
58 gametes (i.e., spermatozoids). The modern descendants of these lineages that have retained  
59 flagellate sperm include the hornworts, liverworts, mosses, lycophytes, ferns, and some  
60 gymnosperms, which comprise approximately 30,000 extant species. During the evolution of  
61 these groups, numerous anatomical innovations arose, including stomata, vascular tissue, roots  
62 and leaves, lignified stems with secondary growth, and seeds. Collectively, these plants hold the  
63 keys to understanding the early evolution of these and other critical features of modern land plant  
64 diversity, which is overwhelmingly represented by non-flagellate angiosperms. Despite their  
65 long evolutionary history, the phylogenetic relationships among many flagellate plant taxa  
66 remain poorly understood, and the lack of a consistent molecular toolkit makes resolving these  
67 relationships difficult.

68 Analyses of large numbers of nuclear loci can provide the power to resolve difficult  
69 phylogenetic relationships and the ability to address patterns of lineage sorting and reticulate  
70 evolution. Recent analyses of single-copy nuclear genes from transcriptome data have provided  
71 insights into backbone relationships among flagellate plants (Wickett et al., 2014; Shen et al.,  
72 2018; Qi et al., 2018; One Thousand Plant Transcriptomes Initiative, 2019). However,  
73 transcriptome sequencing requires access to freshly collected tissue and often is expensive and  
74 impractical, and many loci are either not useful for phylogenetics or only expressed in specific  
75 tissues or stages of development. Therefore, transcriptomic sequencing approaches may not be  
76 feasible for building large-scale phylogenetic trees (see McKain et al., 2018). Target enrichment  
77 methods use short RNA probes, corresponding to selected loci, to bind to DNA from sequencing

78 libraries. The bound DNA is then sequenced, while much of the unbound DNA is discarded  
79 (Gnirke et al., 2009; Cronn et al., 2012; Weitemier et al., 2014). Target enrichment approaches  
80 can be used to obtain data from hundreds of phylogenetically informative nuclear loci at  
81 relatively low cost. These approaches also appear to work well with low-quantity, potentially  
82 degraded DNA samples, like those extracted from herbarium specimens (see Brewer et al., 2019,  
83 Forrest et al., 2019). Target enrichment approaches have been used to generate nuclear datasets  
84 to resolve relationships within several flagellate plant clades, including mosses (Liu et al., 2019;  
85 Medina et al., 2019), ferns (Wolf et al., 2018), and pines (Gernandt et al., 2018; Montes et al.,  
86 2019). However, generating large nuclear datasets for phylogenetic inference among most  
87 flagellate plant taxa remains challenging.

88         In this study, we leveraged recent transcriptome and whole genome sequence data to  
89 design a "universal" probe set that enables target enrichment sequencing across all flagellate  
90 plant lineages. The probes were designed to target 451 relatively conserved exons in single or  
91 low copy nuclear loci. Furthermore, the target enrichment protocol typically also yields sequence  
92 data from the more variable flanking regions that may be useful to resolve relationships among  
93 closely related taxa. We demonstrate the target enrichment protocol using representative from all  
94 major flagellate plant lineages and provide an analytical pipeline to process the resulting data.

95

96

## METHODS

97 ***Probe design*** — We designed target enrichment probes to cover all flagellate plant groups,  
98 including mosses, liverworts, hornworts, lycophytes, ferns, and gymnosperms, using existing  
99 genomic and transcriptomic data. We designed probes to cover conserved exons in single (or

100 low) copy nuclear loci identified by the 1KP initiative (DOI 10.25739/8m7t-4e85; Carpenter et  
101 al., 2019), which assembled transcriptomes from 1,173 green plant species. We examined  
102 available genome sequences from land plant taxa in the 1KP alignments to identify exons that  
103 were at least 120 base pairs (bp) in length that belong to the single copy loci identified by 1KP.  
104 We used a pairwise BLAST of selected exons to find those shared across multiple genomes that  
105 were at least 120 bp long and had at least 65% average pairwise identity. Only regions  
106 represented across multiple genomes, suggesting conservation of exon content across land plants,  
107 were used to design probes. For the probe kit, we identified the best 451 loci (i.e., exons) that  
108 have splice sites conserved across multiple genomes. In some cases, multiple exons used in the  
109 probe set are found within the same gene; in total, the 451 exons we used are found in 248 genes  
110 (see Supplemental Table 1). We aligned and then cut these loci out of the 1KP alignments that  
111 included only the flagellate plant taxa. We clustered the cut sequences for each locus at 90%  
112 similarity and took the centroid sequence of each cluster. We designed the probe set from these  
113 sequences with a 2x tiling density. The resulting *GoFlag 451* probe set consists of 56,989 probes  
114 covering 451 loci and is available on Dryad (<https://doi.org/10.5061/dryad.7pvmcvdqg>). The  
115 term GoFlag refers to the Genealogy of Flagellate plants project, which was funded through the  
116 NSF Genealogy of Life (GoLife) program.

117 To test whether the 451 exons would be phylogenetically informative across land plants,  
118 we extracted these exons from the 1KP translated nucleotide alignments and removed sequences  
119 from non-land plants from the alignments. We concatenated the exon alignments into a  
120 supermatrix and ran a maximum likelihood (ML) search with 100 nonparametric bootstrap (BS)  
121 replicates using RAxML 8.2.10 with the GTR CAT model (Stamatakis, 2014). Alignments for  
122 this analysis also are available on Dryad (<https://doi.org/10.5061/dryad.7pvmcvdqg>).

123 ***Taxon Selection***– We assembled a collection of 188 samples for our pilot study (Supplemental  
124 Table 2). These include representatives of major clades within hornworts (14), liverworts (46),  
125 mosses (48), lycophytes (16), ferns (48), and gymnosperms (16). Within these groups we also  
126 included some sets of closely related taxa (e.g., congeners) to test the probe set's ability to  
127 resolve close relationships (see Supplemental Table 2 for voucher information). Some of these  
128 samples came from herbarium specimens, while others were from recently collected silica dried  
129 tissue. We extracted DNA using a cetyl trimethyl ammonium bromide (CTAB) extraction,  
130 described in Doyle and Doyle (1987), modified for 2-mL extractions, using a Genogrinder 2010  
131 mill (SPEX CertiPrep, Metuchen, NJ), and with 2.5% polyvinylpyrrolidone and 0.4% beta-  
132 mercaptoethanol, and two rounds of chloroform washes followed by an isopropanol precipitation  
133 and an ethanol wash. To remove RNA contamination, between chloroform washes we added  
134 0.2uL of RNase A (Qiagen, Valencia, CA, USA) to each sample.

135 ***Sequence Capture and Sequencing*** — The library construction, target enrichment, and  
136 sequencing were done by RAPiD Genomics (Gainesville, FL, USA). After a bead-based DNA  
137 cleanup step, DNA was normalized to 250 nanograms (ng) and mechanically sheared to an  
138 average size of 300 base pairs (bp). We constructed next-generation libraries by repairing the  
139 ends of the sheared fragments followed by the addition of an adenine residue to the 3'-end of the  
140 blunt-end fragments. Next, we ligated barcoded adapters suited for the Illumina sequencing  
141 platform to the libraries. Ligated fragments were PCR-amplified using standard cycling protocols  
142 (e.g., Mamanova et al. 2010). We pooled 16 barcoded libraries equimolarly to a total of 500 ng  
143 for hybridization. Target enrichment was performed using the custom designed probes and  
144 protocols as suggested by Agilent (Palo Alto, California, USA). After enrichment, samples were  
145 re-amplified for additional 6-12 cycles. All enriched samples were sequenced using an Illumina

146 HiSeq 3000 with paired-end 100 bp reads. The sequence reads were deposited in the NCBI  
147 sequence read archive (SRA; see Bioproject PRJNA630729).

148 ***Bioinformatic and phylogenetic analyses*** — Targeted nuclear exon loci were recovered from  
149 enriched Illumina data using a modified version of the iterative baited assembly pipeline  
150 described by Breinholt et al. (2018). Our six-step pipeline, with all scripts and necessary input  
151 files, is available in Dryad (<https://doi.org/10.5061/dryad.7pvmcvdqg>). In step 1 (*trim reads*),  
152 adapters and bases with Phred scores less than 20 were trimmed from paired-end reads with Trim  
153 Galore! version 0.4.4 ([https://www.bioinformatics.babraham.ac.uk/projects/trim\\_galore/](https://www.bioinformatics.babraham.ac.uk/projects/trim_galore/)). Only  
154 pairs of reads in which both the forward and reverse read were at least 30 bp long were retained  
155 for assembly. In step 2 (*assembly*), the targeted loci were assembled using iterative baited  
156 assembly (IBA) implemented in a previously published Python script (IBA.py;  
157 <http://datadryad.org/resource/doi:10.5061/dryad.rf7g5.2>; Breinholt et al., 2018). For each locus,  
158 the script first finds raw reads with significant homology to the probe region based on the  
159 reference transcriptome sequences from OneKP data and whole genome sequences  
160 (Supplementary Material) using USEARCH version 7.0 (Edgar, 2010) and then performs an  
161 iterative *de novo* assembly with the subset of reads for each locus with BRIDGER version 2014-  
162 12-01 (Chang et al., 2015). In the IBA script, we set the BRIDGER kmer size parameter to 25  
163 and the minimum depth of coverage for the kmers to be included in the assembly to 10. We set  
164 the number of IBA iterations to 3 in order to extend the assembly beyond the probe regions. In  
165 step 3 (*probe trimming*), we separate the probe region sequences to be used in the next step to  
166 assess orthology and format the output.

167         Although the probes were designed from exons in single or low-copy genes across land  
168 plants, it is possible that paralogous or other non-targeted sequences were assembled from the

169 enriched data. Thus, in step 4 (*orthology to reference*) we assessed orthology based on the best  
170 tblastx (Camacho et al. 2009) hit of the probe region of each assembled sequence to the  
171 coordinates of 10 plant genomes representing hornworts, liverworts, mosses, lycophytes, ferns,  
172 and gymnosperms (Supplementary Material). Since assemblies may extend into the flanking  
173 introns, we performed orthology assessment with the assembled probe regions. We called an  
174 assembled sequence an ortholog of the probe if it had no additional tblastx hits with >95% of the  
175 best bit score, outside of a 1000 base pair flanking window around the genomic coordinates of  
176 the probe locus in a reference genome. We only required that a sequence have evidence of  
177 orthology in one of the reference genomes. At this point in the pipeline, a taxon may retain more  
178 than one orthologous sequence for a single locus, potentially representing allelic variation or  
179 duplication.

180 In the fifth step (*contamination filter*), in order to filter out likely contaminants, for each  
181 assembled sequence we performed a tblastx search against the respective reference 1KP and  
182 genomic sequences for that locus. If a sequence's best hit was not from the taxonomic group  
183 (i.e., hornwort, liverwort, moss, lycophyte, fern, or gymnosperm) from which the sequence  
184 came, that sequence was removed as a potential contaminant. Finally, in the sixth step  
185 (*alignment and merge isoforms*), we aligned the probe region-only sequences using MAFFT  
186 version 7.425 (Kato and Standley 2013). Sequences from the same taxon with mismatches due  
187 to heterozygous sites were merged with a Perl script, using IUPAC codes to represent  
188 heterozygous sites.

189 In order to evaluate the usefulness of the probe set for phylogenetic inference, we ran a  
190 ML analysis on a supermatrix of the locus alignments. After completing the pipeline, it is  
191 possible that a sample would still have multiple sequences in an exon alignment where



192 BRIDGER determined that reads represented more than simple allelic diversity, such as  
193 homeologs, paralogs, or alleles inherited through hybridization. In these cases, we retained the  
194 longest sequence and removed the other sequences from that sample. We also removed  
195 sequences from all samples from which we recovered fewer than 10% (i.e., 45) of the loci and  
196 then pruned the alignments so that they only included sites (i.e., columns) that had data from at  
197 least four samples. We concatenated all loci into a single supermatrix and ran a ML search and  
198 100 nonparametric bootstrap (BS) replicates using RAxML 8.2.10 with the GTR CAT model  
199 (Stamatakis, 2014). The scripts used to process the data for phylogenetic analysis and the  
200 supermatrix alignment with locus boundaries are available on Dryad  
201 (<https://doi.org/10.5061/dryad.7pvmcvdqg>).

202

203 ***Optimizing the GoFlag 451 Probe Set*** — Based on the results of this pilot study, we refined the  
204 original *GoFlag 451* probe set to optimize the performance of the target enrichment across  
205 flagellate plants. The resulting *GoFlag 408* probe set is a subset of the original *GoFlag 451*  
206 probe set, which contains 52,306 probes covering 408 of the original 451 loci. For the *GoFlag*  
207 *408* probe set, we removed probes for all but two of the loci that produced sequences from fewer  
208 than 104 samples in this study, along with other probes that were either underperforming or  
209 exhibited strong taxonomic biases (Fig. 3; see Supplemental Table 1). The *GoFlag 408* probe set  
210 is also available on Dryad (<https://doi.org/10.5061/dryad.7pvmcvdqg>) and commercialized by  
211 RAPID Genomics (<http://rapid-genomics.com>). Although we did not run a separate target  
212 enrichment experiment to assess the performance of the *GoFlag 408*, we examined the  
213 phylogenetic signal in the 408 selected loci based on data generated using the *GoFlag 451* probe  
214 set. Specifically, we made a concatenated matrix of just the probe regions corresponding to the

215 *GoFlag 408* probe set, and we ran a ML phylogenetic analysis on that supermatrix as described  
216 above (data available on Dryad).

217

## 218 RESULTS

219 The ML phylogenetic analysis of the supermatrix of the 451 exons used for the design of  
220 the probe set from the 1KP data provided a strongly supported land plant tree with relationships  
221 that are generally consistent with those from formal 1KP analyses (Supplemental Figure 1; One  
222 Thousand Plant Transcriptomes Initiative, 2019). Throughout the tree, 81.5% (767/941) of the  
223 internal branches had 100% BS support, 89.3% of the branches had at least 90% BS support, and  
224 94.6% of the branches had at least 70% BS support (Supplemental Figure 1). This suggests that  
225 the 451 relatively conserved loci covered by the *GoFlag 451* probe set provide sufficient data to  
226 resolve many relationships throughout land plants, and in many cases appear to provide similar if  
227 not better resolution compared to the full 1KP single gene dataset (Supplemental Figure 1; One  
228 Thousand Plant Transcriptomes Initiative, 2019).

229 One measure of the performance of the probe set is the proportion of sequences from  
230 each library that mapped to the probe loci. The target enrichment ranged from 0.1% (*Aneura*  
231 *pinguis* (L.) Dumort, a liverwort) to 89.9% (*Rhynchostegium murale* (Hedw.) Schimp., a moss)  
232 of the reads, with an average across samples of 42.5% and a median of 40.9% (Supplemental  
233 Table 1). The number of loci recovered (out of a possible 451) ranged from 3 (*Mesoptychia*  
234 *badensis* (Gottsche ex Rabenh.) L.Söderstr. et Vána, a liverwort) to 436 (*Podocarpus smithii* de  
235 Laub, a gymnosperm), with an average of 332.4 and a median of 394.0 (Fig. 1; Supplemental  
236 Table 2). While we recovered fewer than 10% of the possible loci in 16 samples, in 82 of the 188

237 samples we recovered at least 90% of the possible loci (Fig. 1; Supplemental Table 2). Overall,  
238 the probes worked well across flagellate plant lineages, with the fewest average number of loci in  
239 the gymnosperm samples, and the most in the mosses (Table 1). There were 17 species in our  
240 target enrichment experiment that also had transcriptome data generated by 1KP (One Thousand  
241 Plant Transcriptomes Initiative, 2019). In 13 of the 17 common species, our target enrichment  
242 study generated data from more of the 451 loci than 1KP (Supplemental Table 3), suggesting  
243 either that these loci were missed in the transcriptome sequencing or our experiment amplified  
244 divergent copies that were excluded from the 1KP alignments.

245         The samples for which we recovered few loci could have had highly diverged sequences  
246 from the probe sites or had poor quality DNA. However, in a few cases species from which we  
247 recovered few loci are closely related to species from which we recovered many loci (e.g.,  
248 *Dryopteris pentheri* (Krasser) C. Chr., 21 loci, vs. *Dryopteris patula* (Sw.) Underw, 431 loci, or  
249 *Elaphoglossum yatesii* (Sodiolo) Christ, 27 loci, vs. *Elaphoglossum bellermannianum* (Klotzsch)  
250 T. Moore, 418 loci; Supplemental Table 2), suggesting that probe site evolution is unlikely to  
251 explain at least some of the failed captures. Similarly, we found no relationship between the  
252 amount of DNA from a given specimen and the number of recovered loci (Fig. 2A; although  
253 note that the input DNA into the library was normalized to 250 ng, meaning that we did not use  
254 more than 250 ng of DNA for any samples, even if they had more than 250 ng of DNA). Some  
255 samples with very little DNA were successful, and some samples with abundant DNA were not  
256 (Fig. 2A), suggesting that DNA quality rather than quantity may be affecting these libraries.  
257 However, the samples from which we recovered few loci all had relatively few reads (Fig. 2B).  
258 We obtained sequence data from an average of 138.6 (median = 147.0) out of 188 total samples  
259 across the 451 loci (Supplemental Table 1), but there also was variation in the number of

260 samples that recovered each locus, and some loci had a taxonomic bias (Fig. 3; Supplemental  
261 Table 1).

262 To evaluate the phylogenetic signal in the data, we constructed a 172-taxon phylogenetic  
263 supermatrix of the 451 loci (i.e., exonic probe regions) that was 90,153 nucleotides in length and  
264 75.5% full (i.e., 24.5% missing data). Of the 170 clades in the ML tree, 139 (82%) had 100% BS  
265 support; 90% of the clades had at least 90% BS support, and only 5 clades had less than 70% BS  
266 support (Fig. 4). The resulting phylogenetic tree is generally consistent with the consensus land  
267 plant phylogeny (e.g., One Thousand Plant Transcriptomes Initiative, 2019). One unexpected  
268 result is the non-monophyly of the two *Targionia hypophylla* L. (liverwort) samples (Fig. 4).  
269 This could be the result of misidentification of the specimens; however, many of the bryophytes  
270 were sampled from mixed herbarium samples that contained tissue from multiple taxa. This may  
271 also explain the relatively large number of contaminant sequences identified in many of the  
272 bryophytes (Supplemental Table 1).

273 To explore the potential for the probe set to resolve relationships among closely related  
274 taxa, we assembled supermatrices including both the probe regions (i.e., conserved exons) and  
275 the more variable flanking regions for samples from the seven genera from which we had at least  
276 four samples. In the supermatrices we only included loci with data from at least four taxa, and  
277 within each locus alignment, we only included columns with at least four nucleotides. By  
278 including the flanking regions, the length of the alignments was between 1.8 and 6.0 times longer  
279 than the probe region-only alignments, with between 2.5 and 10.7 times more variable sites (i.e.,  
280 columns in the alignment that have at least two different nucleotides; Table 2). In contrast to the  
281 exonic probe regions, which can be easily aligned across land plants, it can be difficult to align  
282 the variable flanking regions across distantly related taxa. Nevertheless, the flanking regions

283 potentially can provide a tremendous amount of additional data to infer phylogenies among more  
284 closely related taxa.

285 Finally, the supermatrix for the loci in the optimized *GoFlag 408* probe set from the  
286 samples with data from at least 45 loci was 80,748 bp long and 79.9% full. Although this  
287 supermatrix alignment was 9,405 bp shorter than the supermatrix made from the *GoFlag 451*  
288 loci, the topology and levels of support from the resulting trees were virtually identical  
289 (Supplemental Figure 2).

## 290 CONCLUSIONS

291 Here we have described a probe set targeting nuclear loci across flagellate plants that  
292 diverged as much as ~450 million years ago. The probe region (i.e., exon) sequences are easily  
293 aligned across land plants and can help resolve backbone phylogenetic relationships among  
294 flagellate plant lineages (Fig. 4; Supplemental Figures 1,2). Furthermore, the more variable  
295 flanking regions provide abundant data for resolving relationships among closely related species,  
296 or potentially even populations within a species (Table 2). Although the *GoFlag 451* probe set  
297 worked well in all major extant flagellate plant lineages (Table 1; Figs. 1, 3), the sampling from  
298 this study is not sufficient to determine if the probe set will work well in all flagellate plant taxa.  
299 Our strategy was to develop a "universal" probe set that covers the majority of these groups, and  
300 the *GoFlag 451* probe set and the analysis pipeline provide a core set of validated tools  
301 accessible to all scientists. However, some evolutionary questions in the flagellate plants may  
302 require a more specific probe set for more closely related taxa (e.g., Larridon et al., 2020). While  
303 the *GoFlag 451* probe set facilitates target enrichment projects in any flagellate plant group, a  
304 probe set designed for a particular lineage could easily have more specific probes that cover

305 either more loci, loci of special interest (e.g., Medina et al., 2019; Montes et al., 2019), or loci  
306 with higher substitution rates (de La Harpe et al. 2019). Resolving some of the more contentious  
307 flagellate plant relationships may likewise require a larger, more specific probe set. In those  
308 cases, the *GoFlag 451* probes define a core set of loci that can be built upon. Nuclear gene  
309 evolution within land plants is often extremely complex, with, for example, frequent gene and  
310 whole genome duplications. Although nuclear loci have the potential to resolve complex  
311 evolutionary relationships, their own complex histories can easily mislead and complicate  
312 phylogenetic inference. Our test for orthology in the analytical pipeline is simplistic, and in this  
313 study, we did not carefully examined potential issues of paralogy or homoeology in the 451 loci  
314 within flagellate plants. However, the resulting sequence data can be used to examine gene or  
315 genome duplication, or even allelic variation and heterozygosity.

316 In subsequent sequencing runs, the GoFlag project has used the *GoFlag 408* probe set,  
317 and results indicate similar, if not better, overall performance compared to the *GoFlag 451* probe  
318 set (JGB, unpublished observation). Due to the large number of probes needed to cover the  
319 diversity of flagellate plants, we did not include the angiosperms when designing the GoFlag  
320 probe sets. However, the same exons appear to be conserved across angiosperms and provide  
321 sufficient data to resolve many angiosperm relationships (Supplemental Figure 1). Thus, the loci  
322 in this probe set may provide a foundation for constructing large-scale nuclear phylogenies  
323 across land plants.

324

325 **Acknowledgements:** This work was funded by the U.S. National Science Foundation (DEB-  
326 1541506). We thank Jim Leebens-Mack and Gane Wong for early access to 1KP transcriptome

327 data, Matt Johnson for discussions and advice about probe design, and Adam Payton for lab help,  
328 especially with scaling up the DNA extraction capacity.

329

330 **Data Availability:** Sequence reads have been deposited to the National Center for  
331 Biotechnology (NCBI) Sequence Read Archive (PRJNA630729). The *GoFlag 451* and *GoFlag*  
332 *408* probe sets are available on Dryad (<https://doi.org/10.5061/dryad.7pvmcvdqg>) with the  
333 pipeline scripts and reference sequences, the post-processing scripts, and all phylogenetic matrices  
334 and trees from this study. Accessions and voucher information are in Supplemental Table 2.

335

## 336 LITERATURE CITED

- 337 Breinholt, J. W., C. Earl, A. R. Lemmon, E. Moriarty Lemmon, L. Xiao, and A. Y. Kawahara.  
338 2018. Resolving relationships among the megadiverse butterflies and moths with a novel  
339 pipeline for anchored phylogenomics. *Systematic Biology* 67: 78-93.
- 340 Brewer, G.E., J. J. Clarkson, O. Maurin, A. R. Zuntini, V. Barber, S. Bellot, N. Biggs, R. S.  
341 Cowan, N. M. J. Davies, S. Dodsworth, S. L. Edwards, W. L. Eiserhardt, N. Epiawalage,  
342 S. Frisby, A. Grall, P. J. Kersey, L. Pokorny, I. J. Leitch, F. Forest, and W. J. Baker.  
343 2019. Factors affecting targeted sequencing of 353 nuclear genes from herbarium  
344 specimens spanning the diversity of angiosperms. *Frontiers in Plant Science* 10: 1102.
- 345 Camacho, C., G. Coulouris, V. Avagyan, N. Ma, J. Papadopoulos, K. Bealer, and T. L. Madden.  
346 2009. BLAST+: architecture and applications. *BMC Bioinformatics* 10: 1-9.
- 347 Carpenter, E. J., N. Matasci, S. Ayyampalayam, S. Wu, J. Sun, J. Yu, F. R. J. Vieira, C. Bowler,  
348 R. G. Dorrell, M. A. Gitzendanner, L. Li, W. Du, K. K. Ullrich, N. J. Wickett, T. J.  
349 Barkmann, M. S. Barker, J. H. Leebens-Mack, G. K.-S. Wong. Access to RNA-

350 sequencing data from 1,173 plant species: The 1000 Plant transcriptomes initiative  
351 (1KP). *GigaScience* 8: giz126.

352 Chang, Z., G. Li, J. Liu, Y. Zhang, C. Ashby, D. Liu, C. L. Cramer, and X. Huang. 2015.  
353 Bridger: a new framework for *de novo* transcriptome assembly using RNA-seq data.  
354 *Genome Biology* 16: 30.

355 Cronn, R., B. J. Knaus, A. Liston, P. J. Maughan, M. Parks, J. V. Syring, and J. Udall. 2012.  
356 Targeted enrichment strategies for next-generation plant biology. *American Journal of*  
357 *Botany* 99: 291-311.

358 de La Harpe, M., J. Hess, O. Loiseau, N. Salamin, C. Lexer, and M. Paris. 2019. A dedicated  
359 target capture approach reveals variable genetic markers across micro- and macro-  
360 evolutionary time scales in palms. *Molecular Ecology Resources* 19: 221-234.

361 Doyle J. J., and J. L. Doyle. 1987. A rapid DNA isolation procedure for small quantities of fresh  
362 leaf tissue. *Phytochemical Bulletin* 19: 11-15.

363 Edgar, R. C. 2010. Search and clustering orders of magnitude faster than BLAST. *Bioinformatics*  
364 26: 2460-2461.

365 Forrest, L. L., M. L. Hart, M. Hughes, H. P. Wilson, K.-F. Chung, Y.-H. Tseng, and C. A.  
366 Kidner. 2019. The limits of Hyb-Seq for herbarium specimens: impact of preservation  
367 techniques. *Frontiers in Ecology and Evolution* 7: 439.

368 Gernandt, D. S., X. Aguirre-Dugua, A. Vázquez-Lobo, A. Willyard, A. Moreno Letelier, J. A.  
369 Pérez de la Rosa, D. Piñero, and A. Liston. 2018. Multi-locus phylogenetics, lineage  
370 sorting, and reticulation in *Pinus* subsection *Australes*. *American Journal of Botany* 105:  
371 711-725.



372 Gnrirke, A., A. Melnikov, J. Maguire, P. Rogov, E. M. LeProust, W. Brockman, T. Fennell, G.  
373 Giannoukos, S. Fisher, C. Russ, S. Gabriel, D. B. Jaffe, E. S. Lander, and C. Nusbaum.  
374 2009. Solution hybrid selection with ultra-long oligonucleotides for massively parallel  
375 targeted sequencing. *Nature Biotechnology* 27: 182-189.

376 Katoh, K., and D. M. Standley. 2013. MAFFT multiple sequence alignment software version 7:  
377 improvements in performance and usability. *Molecular Biology and Evolution* 30: 772-  
378 780.

379 Larridon, I., T. Villaverde, A. R. Zuntini, L. Pokorny, G. E. Brewer, N. Epiawalage, I. Fairlie,  
380 M. Hahn, J. Kim, E. Maguilla, O. Maurin, M. Xanthos, A. L. Hipp, F. Forest, and W. J.  
381 Baker. 2020. Tackling rapid radiations with targeted sequencing. *Frontiers in Plant*  
382 *Science* 10: 1655.

383 Liu, Y., M. G. Johnson, C. J. Cox, R. Medina, N. Devos, A. Vanderpoorten, L. Hedenäs, N. E.  
384 Bell, J. R. Shevock, B. Aguero, D. Quandt, N. J. Wickett, A. J. Shaw, and B. Goffinet.  
385 2019. Resolution of the ordinal phylogeny of mosses using targeted exons from  
386 organellar and nuclear genomes. *Nature Communications* 10: 1485.

387 Mamanova, L., A. J. Coffey, C. E. Scott, I. Kozarewa, E. H. Turner, A. Kumar, E. Howard, J.  
388 Shendure, and D. J. Turner. 2010. Target-enrichment strategies for next-generation  
389 sequencing. *Nature Methods* 7: 111–118.

390 McKain, M. R., M. G. Johnson, S. Uribe-Convers, D. Eaton, and Y. Yang. 2018. Practical  
391 considerations for plant phylogenomics. *Application in Plant Sciences* 6: e1038.

392 Medina, R., M. G. Johnson, Y. Liu, N. J. Wickett, A. J. Shaw, and B. Goffinet. 2019.  
393 Phylogenomic delineation of *Physcomitrium* (Bryophyta: Funariaceae) based on targeted  
394 sequencing of nuclear exons and their flanking regions rejects the retention of

- 395 *Physcomitrella*, *Physcomitridium* and *Aphanorrhagma*. *Journal of Systematics and*  
396 *Evolution* 57: 404-417.
- 397 Montes, J. R., P. Peláez, A. Willyard, A. Moreno-Letelier, D. Piñero, and D. S. Gernandt. 2019.  
398 Phylogenetics of *Pinus* subsection *Cembroides* Engelm. (Pinaceae) inferred from low-  
399 copy nuclear sequences. *Systematic Botany* 44: 501-518.
- 400 One Thousand Plant Transcriptomes Initiative. 2019. One thousand plant transcriptomes and the  
401 phylogenomics of green plants. *Nature* 574: 679-685.
- 402 Qi, X., L.-Y. Kuo, C. Guo, H. Li, Z. Li, J. Qi, L. Wang, Y. Hu, J. Xiang, C. Zhang, J. Guo, C.-H.  
403 Huang, and H. Ma. 2018. A well-resolved fern nuclear phylogeny reveals the  
404 evolutionary history of numerous transcription factor families. *Molecular Phylogenetics*  
405 *and Evolution* 127: 961-977.
- 406 Shen, H., D. Jin, J.-P. Shu, X.-L. Zhou, M. Lei, R. Wei, H. Shang, H.-J. Wei, R. Zhang, L. Liu,  
407 Y.-F. Gu, X.-C. Zhang, and Y.-H. Yan. 2018. Large-scale phylogenomic analysis  
408 resolves a backbone phylogeny in ferns. *GigaScience* 7: gix116.
- 409 Stamatakis, A. 2014. RAxML version 8: a tool for phylogenetic analysis and post-analysis of  
410 large phylogenies. *Bioinformatics* 30: 1312-1313.
- 411 Weitemier, K., S. C. K. Straub, R. C. Cronn, M. Fishbein, R. Schickl, A. McDonnell, and A.  
412 Liston. 2014. Hyb-Seq: combining target enrichment and genome skimming for plant  
413 phylogenetics. *Applications in Plant Sciences* 2: 1400042.
- 414 Wickett, N.J., S. Mirarab, N.-p. Nguyen, T. Warnow, E. Carpenter, N. Matasci, S.  
415 Ayyampalayam, M. Barker, J.G. Burleigh, M.A. Gitzendanner, B.R. Ruhfel, E. Wafula,  
416 J.P. Der, S.W. Graham, S. Mathews, M. Melkonian, D.E. Soltis, P.S. Soltis, N.W. Miles,  
417 C.J. Rothfels, L. Pokorny, A.J. Shaw, L. DeGironimo, D.W. Stevenson, B. Surek, J.C.

418 Villarreal, B. Roure, H. Philippe, C.W. dePamphilis, T. Chen, M.K. Deyholos, R.  
419 Baucom, T.M. Kutchan, M. Rolf, J. Wang, Y. Zhang, Z. Tian, Z. Yan, X. Wu, X. Sun,  
420 G.K.-S. Wong, and J. Leebens-Mack. 2014. A phylotranscriptomics analysis of the origin  
421 and early diversification of land plants. *Proceedings of the National Academy of*  
422 *Sciences, USA* 111: E4859-E4868.

423 Wolf, P., T. A. Robison, M. G. Johnson, M. A. Sundue, W. L. Testo, and C. J. Rothfels. 2018.  
424 Targeted sequence capture of nuclear-encoded genes for phylogenetic analysis of ferns.  
425 *Applications in Plant Sciences* 6: e1148.

426 Table 1. Distribution of loci with sequence data (out of a possible 451) across major flagellate  
427 plant lineages.

| Lineage     | Number of Samples | Average Loci<br>Recovered | Median<br>Loci<br>Recovered |
|-------------|-------------------|---------------------------|-----------------------------|
| Ferns       | 48                | 291.9                     | 369.0                       |
| Gymnosperms | 16                | 291.3                     | 314.5                       |
| Hornworts   | 14                | 365.9                     | 387.5                       |
| Liverworts  | 46                | 281.7                     | 346.5                       |
| Lycophytes  | 16                | 379.8                     | 401.0                       |
| Mosses      | 48                | 409.8                     | 415.0                       |

428

429

430 Table 2. Comparison of phylogenetic data from probe regions (i.e., exons) and the probe + flanking regions for the seven genera with  
 431 at least four samples.

| Genus                | Lineage  | Samples | Loci | Probe Region Only |                     | Probe & Flanking Regions |                     |
|----------------------|----------|---------|------|-------------------|---------------------|--------------------------|---------------------|
|                      |          |         |      | Alignment (bp)    | Variable Characters | Alignment (bp)           | Variable Characters |
| <i>Aulacomnium</i>   | Moss     | 4       | 414  | 75492             | 2846                | 422123                   | 30542               |
| <i>Dicranum</i>      | Moss     | 7       | 415  | 76177             | 2341                | 441413                   | 19510               |
| <i>Dryopteris</i>    | Fern     | 5       | 223  | 48437             | 3158                | 86463                    | 7955                |
| <i>Elaphoglossum</i> | Fern     | 8       | 386  | 74673             | 2165                | 185268                   | 8118                |
| <i>Lophosoria</i>    | Fern     | 4       | 417  | 78941             | 1014                | 223274                   | 4250                |
| <i>Phaeoceros</i>    | Hornwort | 8       | 397  | 75394             | 5803                | 252294                   | 22148               |
| <i>Sphagnum</i>      | Moss     | 10      | 409  | 74202             | 3951                | 444271                   | 39242               |

432 Figure 1. Distribution of number of loci successfully sequenced (out of a possible 451) per taxon  
433 sample. Colors represent the lineages of the samples. Each locus is a relatively conserved exon  
434 from a single or low-copy nuclear gene.

435  
436 Figure 2. A) Amount of DNA in each sample vs. the number of resulting loci obtained in the  
437 targeted enrichment analysis. The dashed line at 250 ng represents the amount of DNA at which  
438 samples were normalized for the library preparation. B) Number of reads obtained from each  
439 sample vs. the number of loci obtained from the targeted enrichment analysis. Colors represent  
440 the major lineage of the sample.

441  
442 Figure 3. Heat map showing the distribution of data in the flagellate plant samples across the 451  
443 probe regions (i.e., exons). Loci that were missing for an individual are colored blue in the  
444 heatmap while sampled loci are grey. Black bars along the bottom of the heatmap indicate loci  
445 with biases among major plant groups, where less than 25% of one group had the locus and over  
446 75% of another group had the locus.

447  
448 Figure 4. Phylogram from a ML analysis of the supermatrix made by concatenating the  
449 alignments from the *GoFlag 451* probe regions (i.e., exons) for the samples with at least 45 loci.  
450 The tree was arbitrarily rooted between the bryophytes and vascular plants.

451  
452 Supplemental Figure 1. Phylogram from an ML analysis of a supermatrix made by concatenating  
453 1KP transcriptome sequences from the gene regions covered by the *GoFlag 451* probe set. The  
454 tree was arbitrarily rooted between the bryophytes and vascular plants.

455

456 Supplemental Figure 2. Phylogram from a ML analysis of the supermatrix made by  
457 concatenating the alignments from the *GoFlag 408* probe regions (i.e., exons) for the samples  
458 with at least 45 loci. The tree was arbitrarily rooted between the bryophytes and vascular plants.

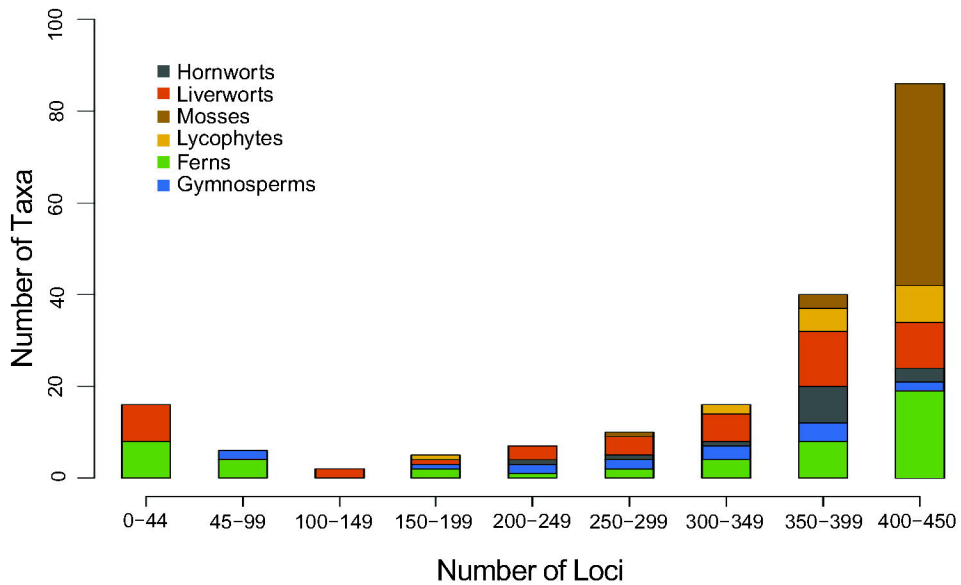



A

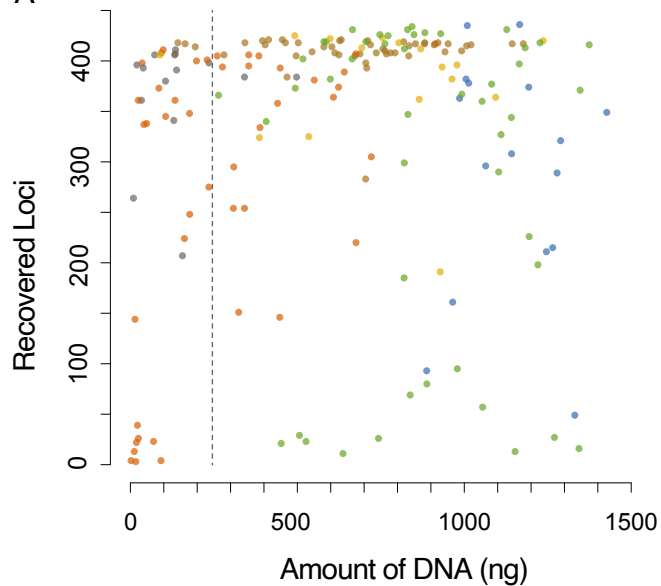

B

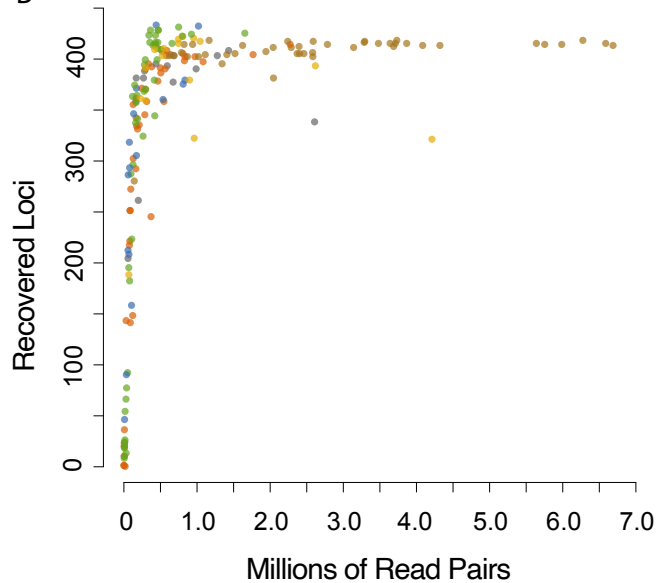

Legend for plant groups:

- Hornworts (grey square)
- Liverworts (orange square)
- Mosses (brown square)
- Lycophytes (yellow square)
- Ferns (green square)
- Gymnosperms (blue square)

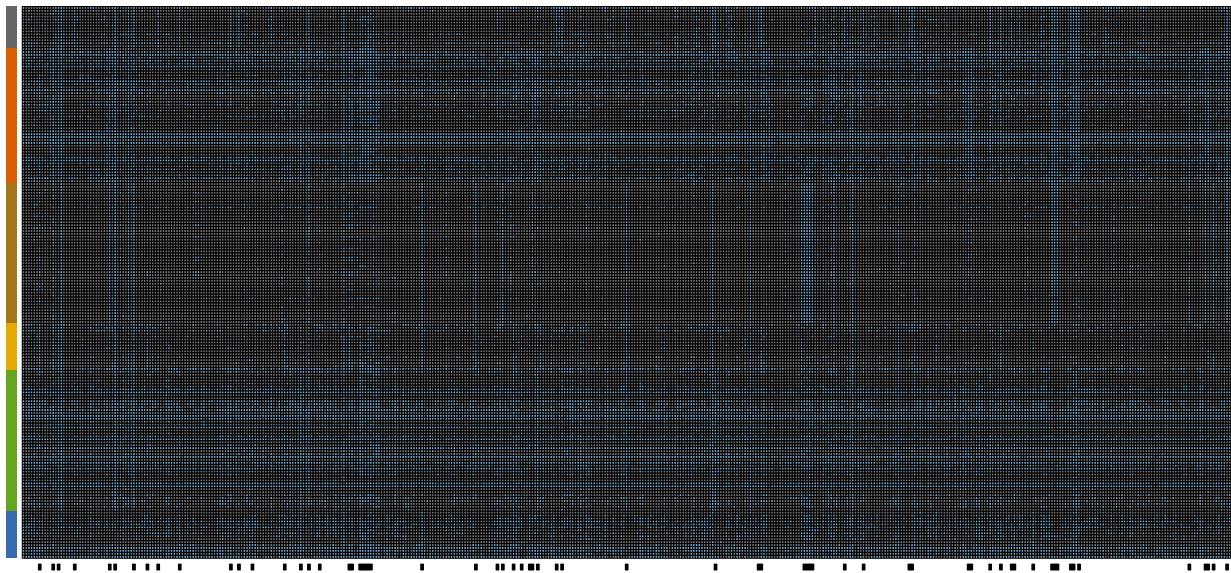

■ Hornworts   ■ Liverworts   ■ Mosses   ■ Lycophytes   ■ Ferns   ■ Gymnosperms

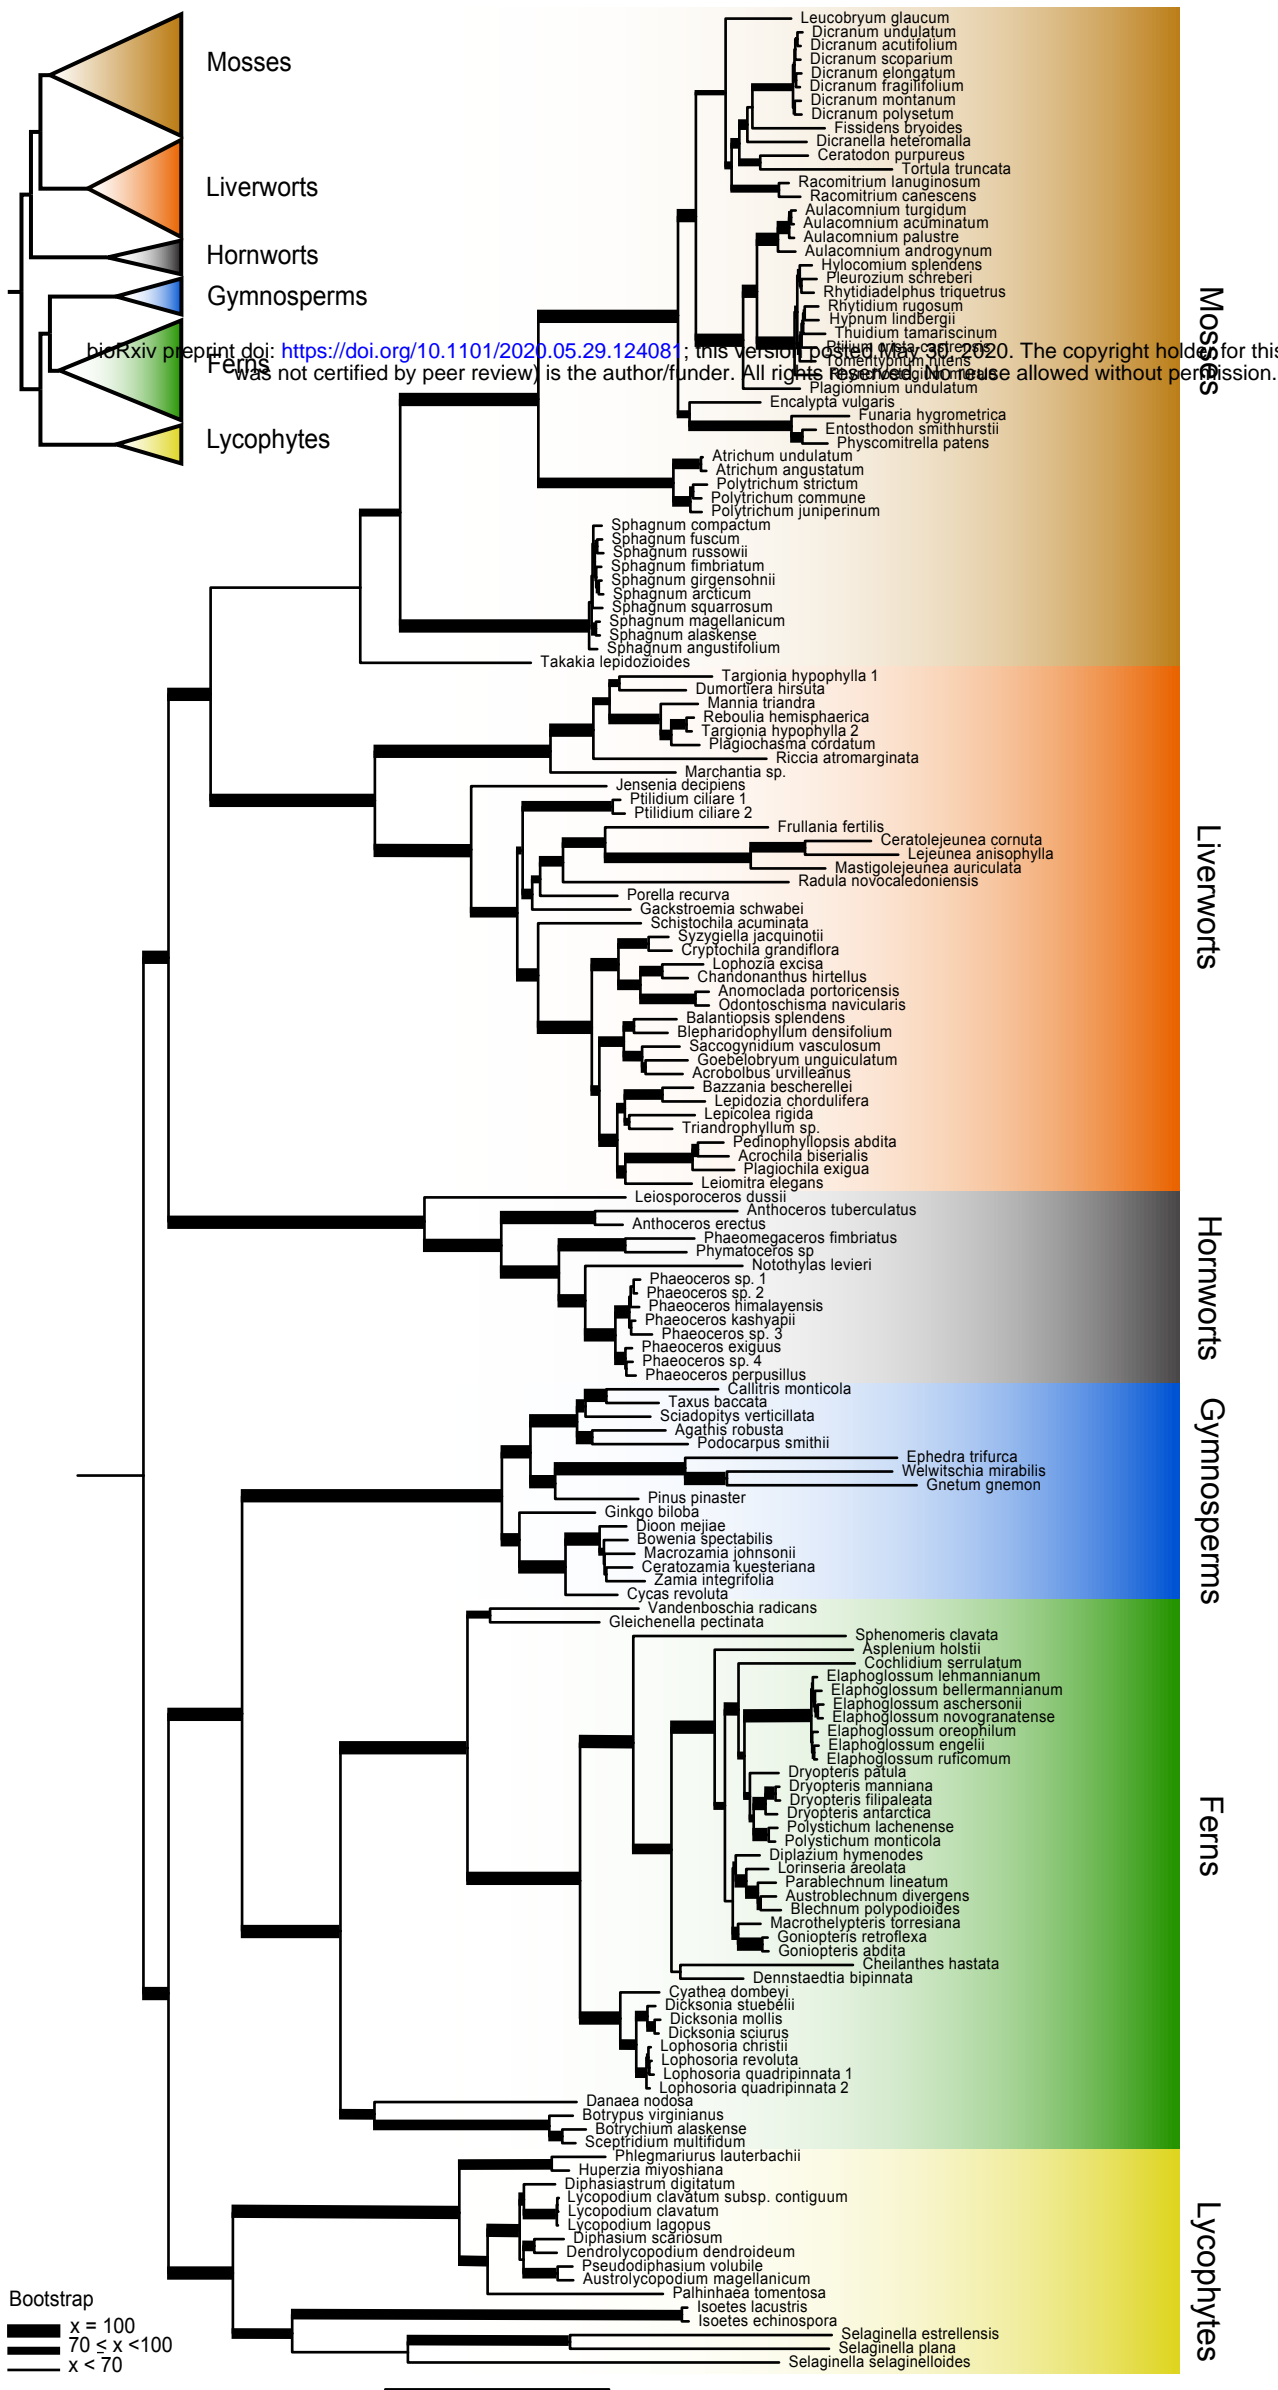

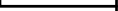

Source: https://www.biorxiv.org/content/10.1101/2020.05.29.124081v1.full.pdf
