# Supplementary material for: A target enrichment probe set for resolving the flagellate plant tree of life
Source: bioRxiv or medRxiv preprint supplement (doi:10.1101/2020.05.29.124081), 2020-05-30
Supplement: Supplementary file [file media-5.pdf]

Bootstrap  
 x = 100  
 70 ≤ x < 100  
 x < 70

Gymnosperms

Ferns

Lycophytes

Hornworts

Mosses

Liverworts

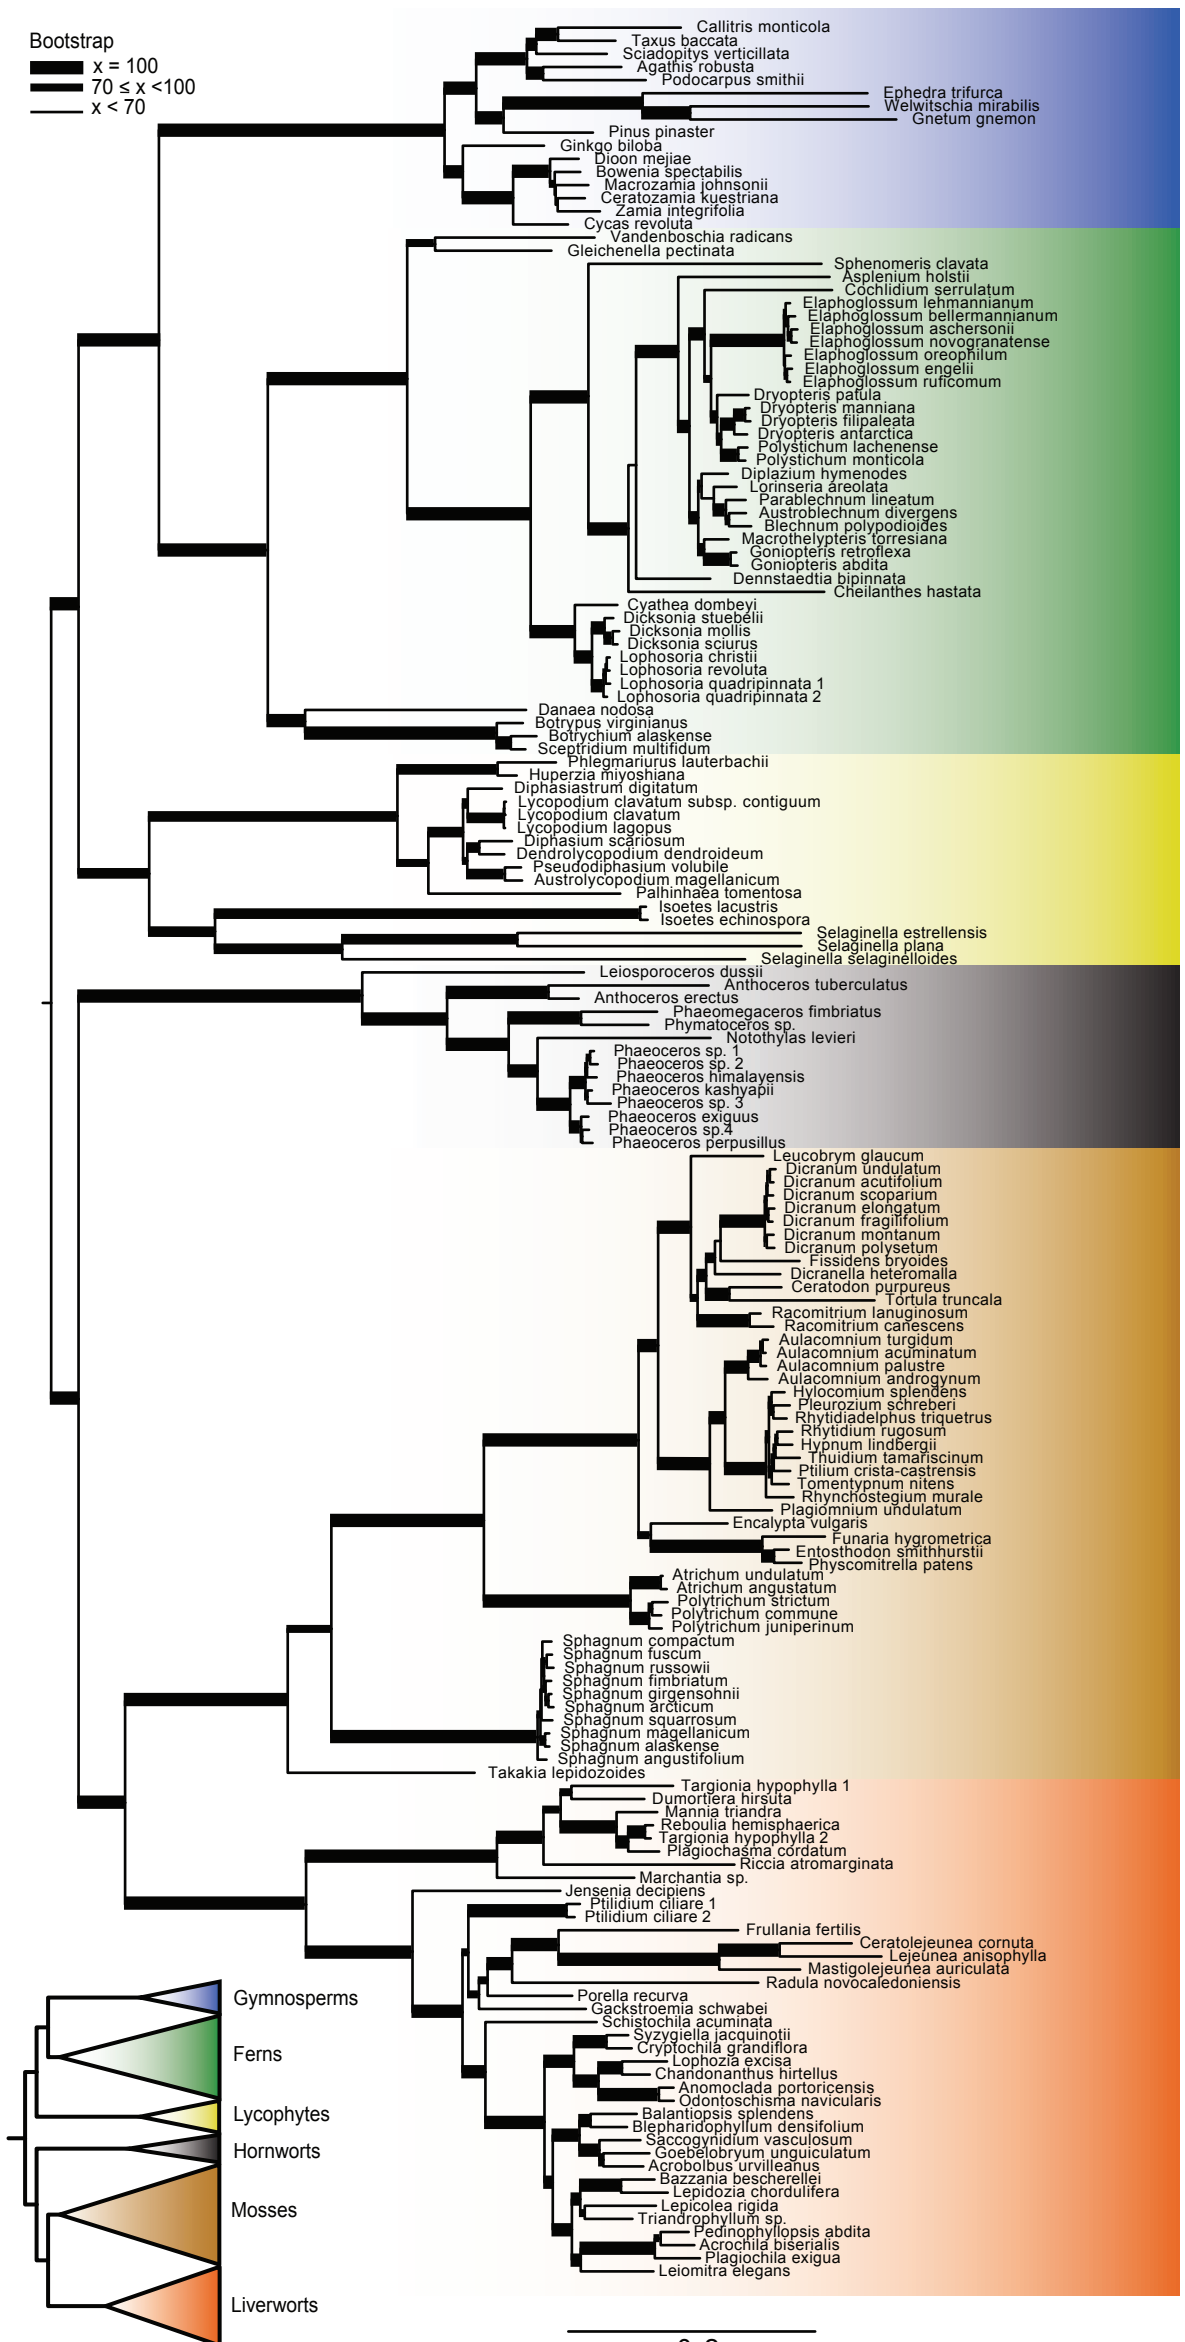

0.2
